# Supplementary material for: Molecular Weight-Dependent Oxidation and Optoelectronic Properties of Defect-Free Macrocyclic Poly(3-hexylthiophene)
Source: Polymers (Basel). 2023 Jan 28;15(3):666. doi: 10.3390/polym15030666 (PMC9920727; doi:10.3390/polym15030666)
Supplement: Supplementary file 1 [file polymers-15-00666-s001.zip › polymers-2163488-supplementary.pdf]

## **Supplementary Materials**

### **Molecular Weight-Dependent Oxidation and Optoelectronic Properties of Defect-Free Macrocyclic Poly(3-hexylthiophene)**

Ryohei Sato,<sup>1</sup> Atsuo Utagawa,<sup>1</sup> Koji Fushimi,<sup>2</sup> Feng Li,<sup>2</sup> Takuya Isono,<sup>2</sup> Kenji Tajima,<sup>2</sup> Toshifumi Satoh,<sup>2</sup> Shin-ichiro Sato,<sup>2</sup> Hiroshi Hirata,<sup>3</sup> Yoshihiro Kikkawa,<sup>4</sup> and Takuya Yamamoto<sup>2,\*</sup>

<sup>1</sup> Graduate School of Chemical Sciences and Engineering, Hokkaido University, Sapporo, Hokkaido 060–8628, Japan

<sup>2</sup> Division of Applied Chemistry, Faculty of Engineering, Hokkaido University, Sapporo, Hokkaido 060–8628, Japan

<sup>3</sup> Division of Bioengineering and Bioinformatics, Faculty of Information Science and Technology, Hokkaido University, Sapporo, Hokkaido 060–0814, Japan

<sup>4</sup> National Institute of Advanced Industrial Science and Technology (AIST), Tsukuba Central 5, 1–1–1 Higashi, Tsukuba, Ibaraki 305–8565, Japan

\* Author to whom correspondence should be addressed.

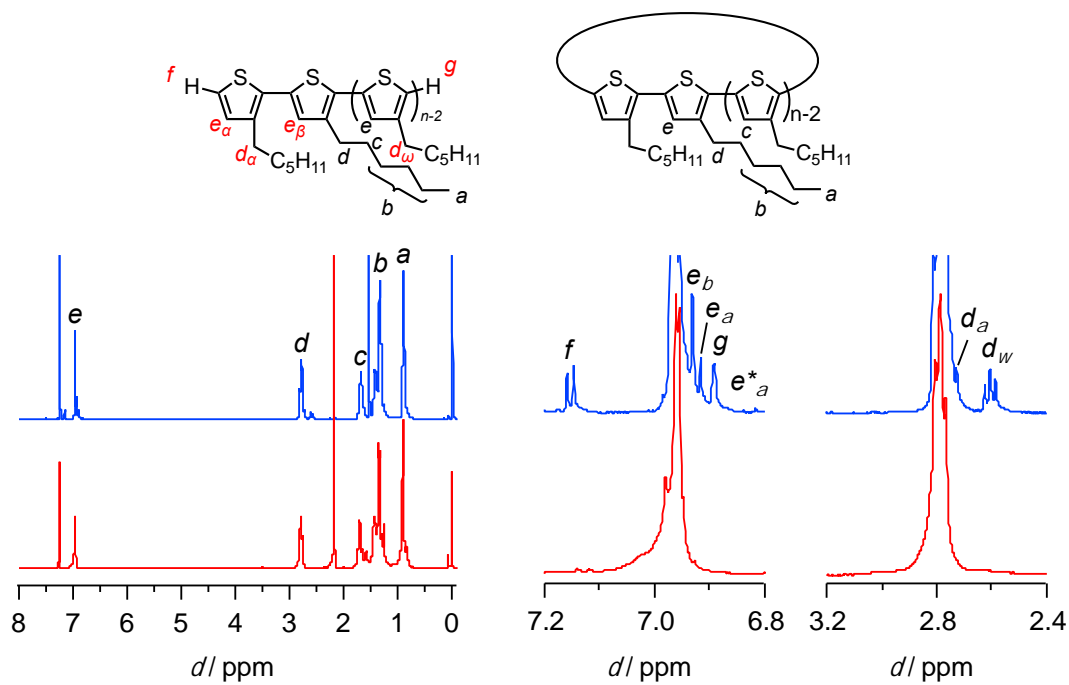

**Figure S1.**  $^1\text{H}$  NMR spectra of  $\text{L}_{14}$  (blue) and  $\text{C}_{14}$  (red).

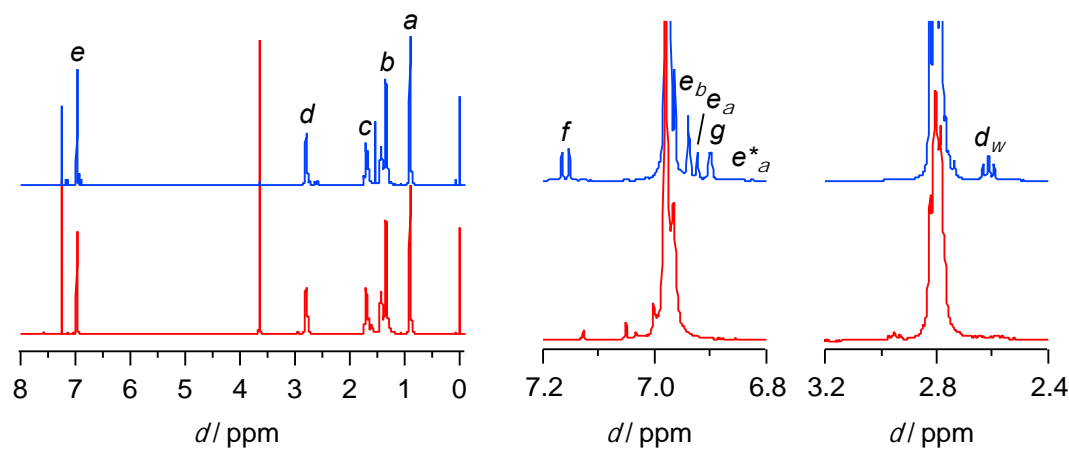

**Figure S2.**  $^1\text{H}$  NMR spectra of  $\text{L}_{21}$  (blue) and  $\text{C}_{21}$  (red).

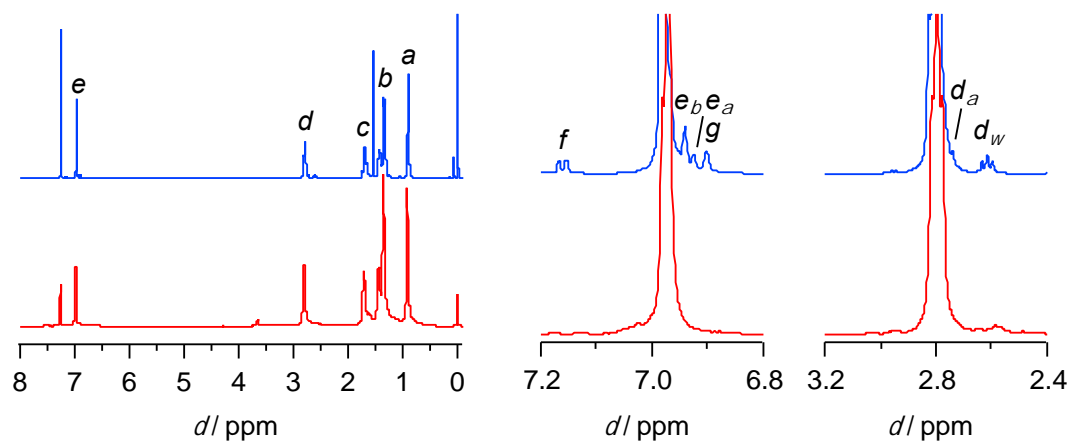

**Figure S3.**  $^1\text{H}$  NMR spectra of  $\text{L}_{26}$  (blue) and  $\text{C}_{26}$  (red).

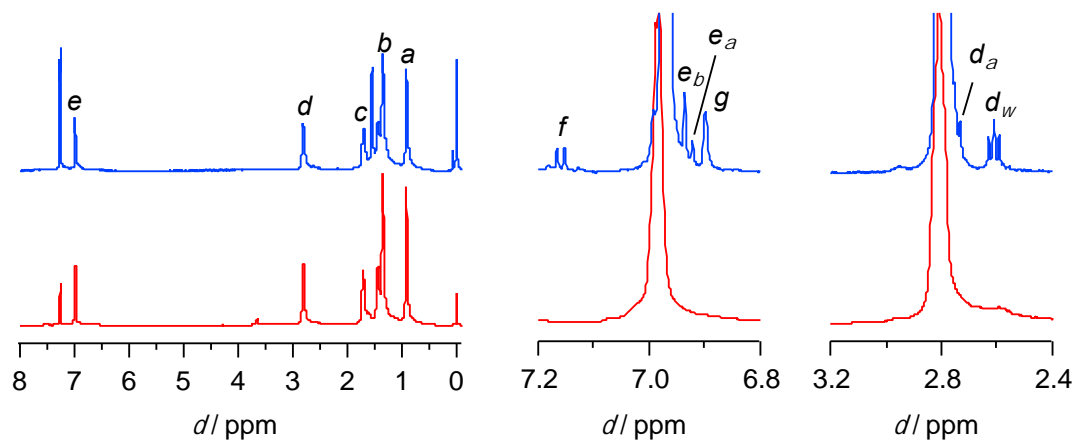

**Figure S4.**  $^1\text{H}$  NMR spectra of  $\text{L}_{29}$  (blue) and  $\text{C}_{29}$  (red).

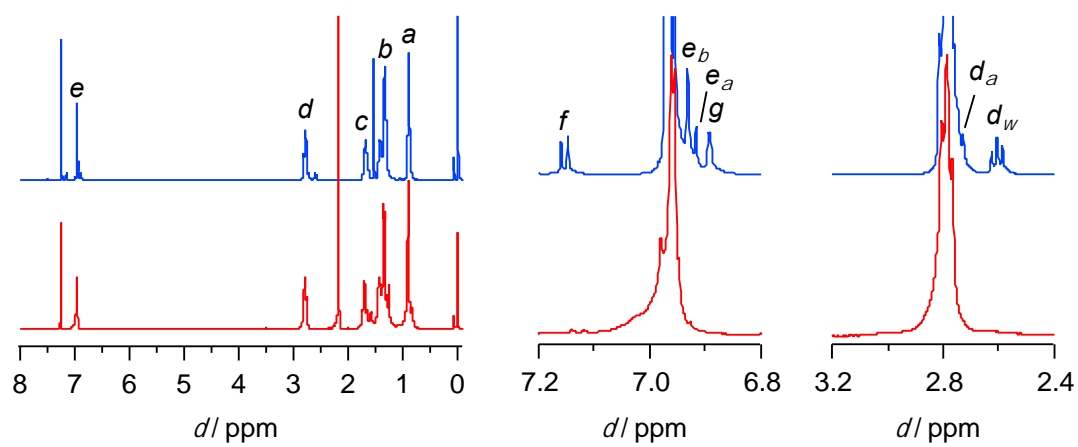

**Figure S5.**  $^1\text{H}$  NMR spectra of **L**<sub>43</sub> (blue) and **C**<sub>43</sub> (red).

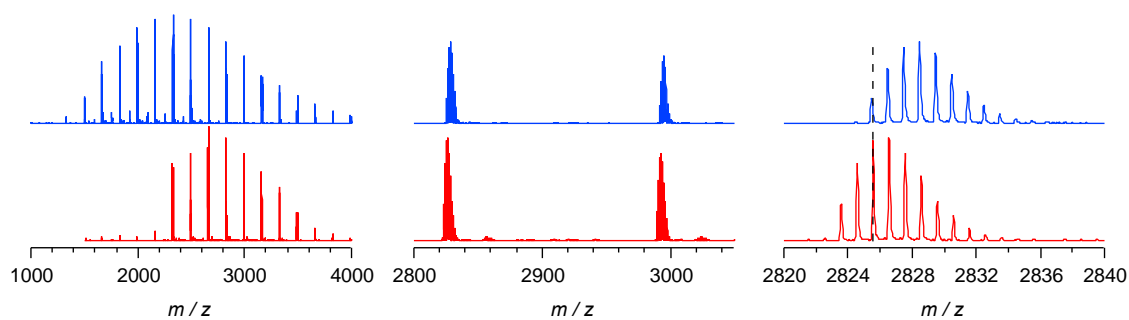

**Figure S6.** Full and expanded MALDI-TOF MS spectra of **L<sub>14</sub>** (blue) and **C<sub>14</sub>** (red).

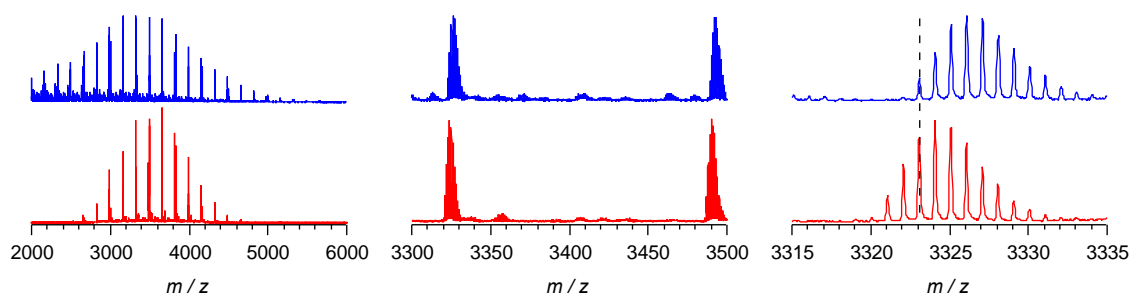

**Figure S7.** Full and expanded MALDI-TOF MS spectra of **L<sub>21</sub>** (blue) and **C<sub>21</sub>** (red).

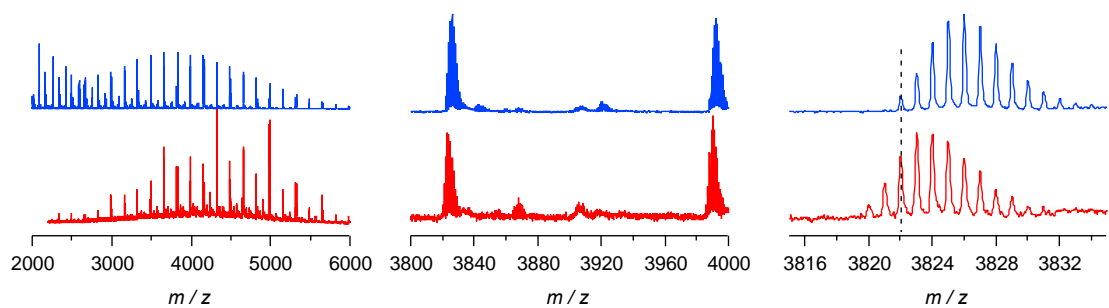

**Figure S8.** Full and expanded MALDI-TOF MS spectra of **L<sub>26</sub>** (blue) and **C<sub>26</sub>** (red).

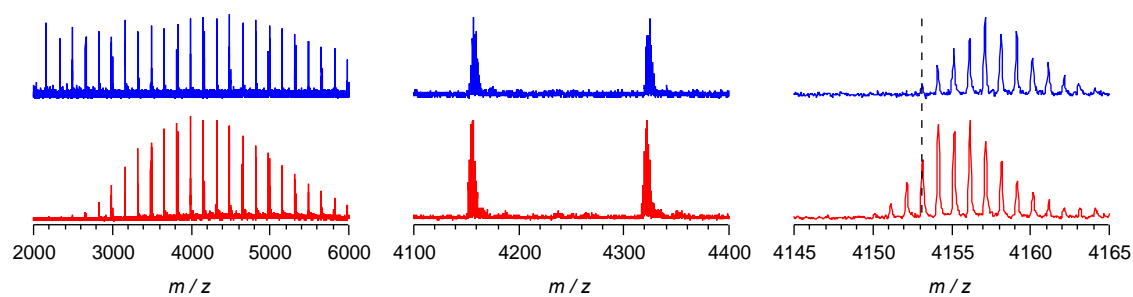

**Figure S9.** Full and expanded MALDI-TOF MS spectra of **L<sub>29</sub>** (blue) and **C<sub>29</sub>** (red).

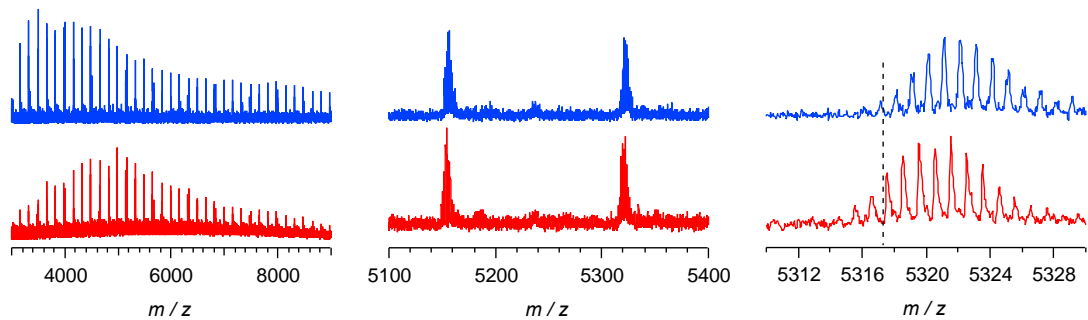

**Figure S10.** Full and expanded MALDI-TOF MS spectra of **L<sub>43</sub>** (blue) and **C<sub>43</sub>** (red).

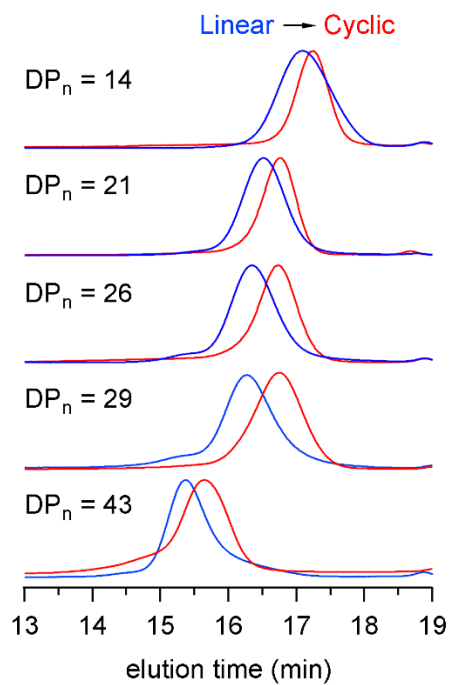

**Figure S11.** Analytical SEC traces of linear (blue) and cyclic (red) P3HT.

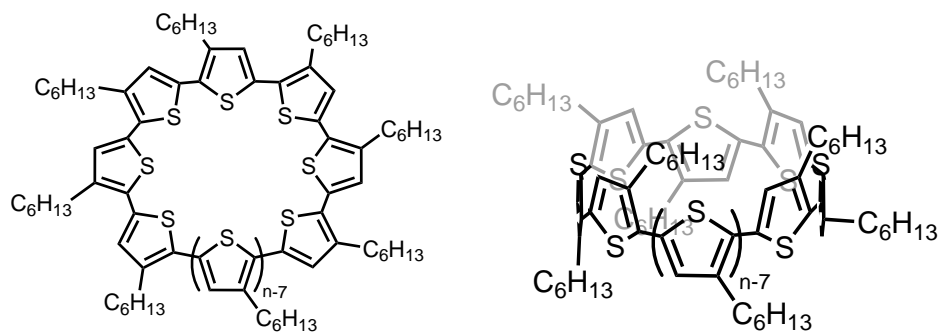

**Figure S12** Cisoid (left) and transoid (right) structures of cyclic P3HT.

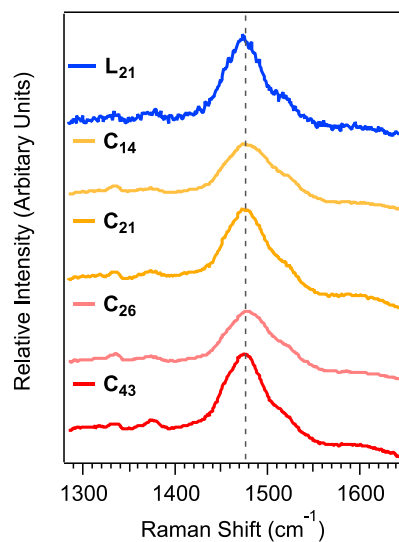

**Figure S13.** Raman spectra of linear and cyclic P3HT (L<sub>21</sub>, C<sub>14</sub>, C<sub>21</sub>, C<sub>26</sub>, C<sub>43</sub>).

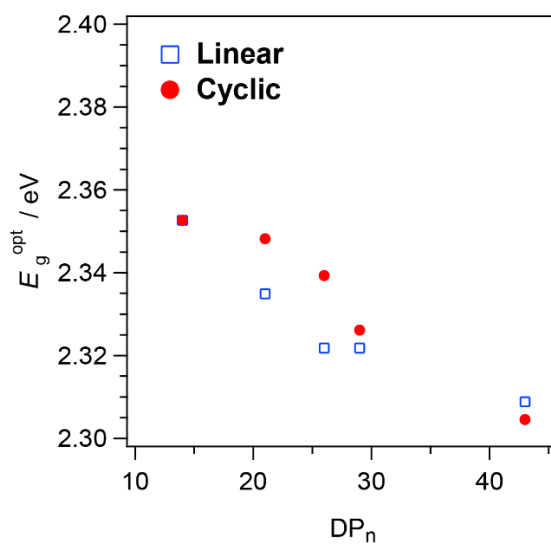

**Figure S14.** Optical band gaps ( $E_g^{\text{opt}}$ ) of linear (blue square) and cyclic (red circle) P3HT calculated from the  $S_0 \rightarrow S_2$  absorption band.

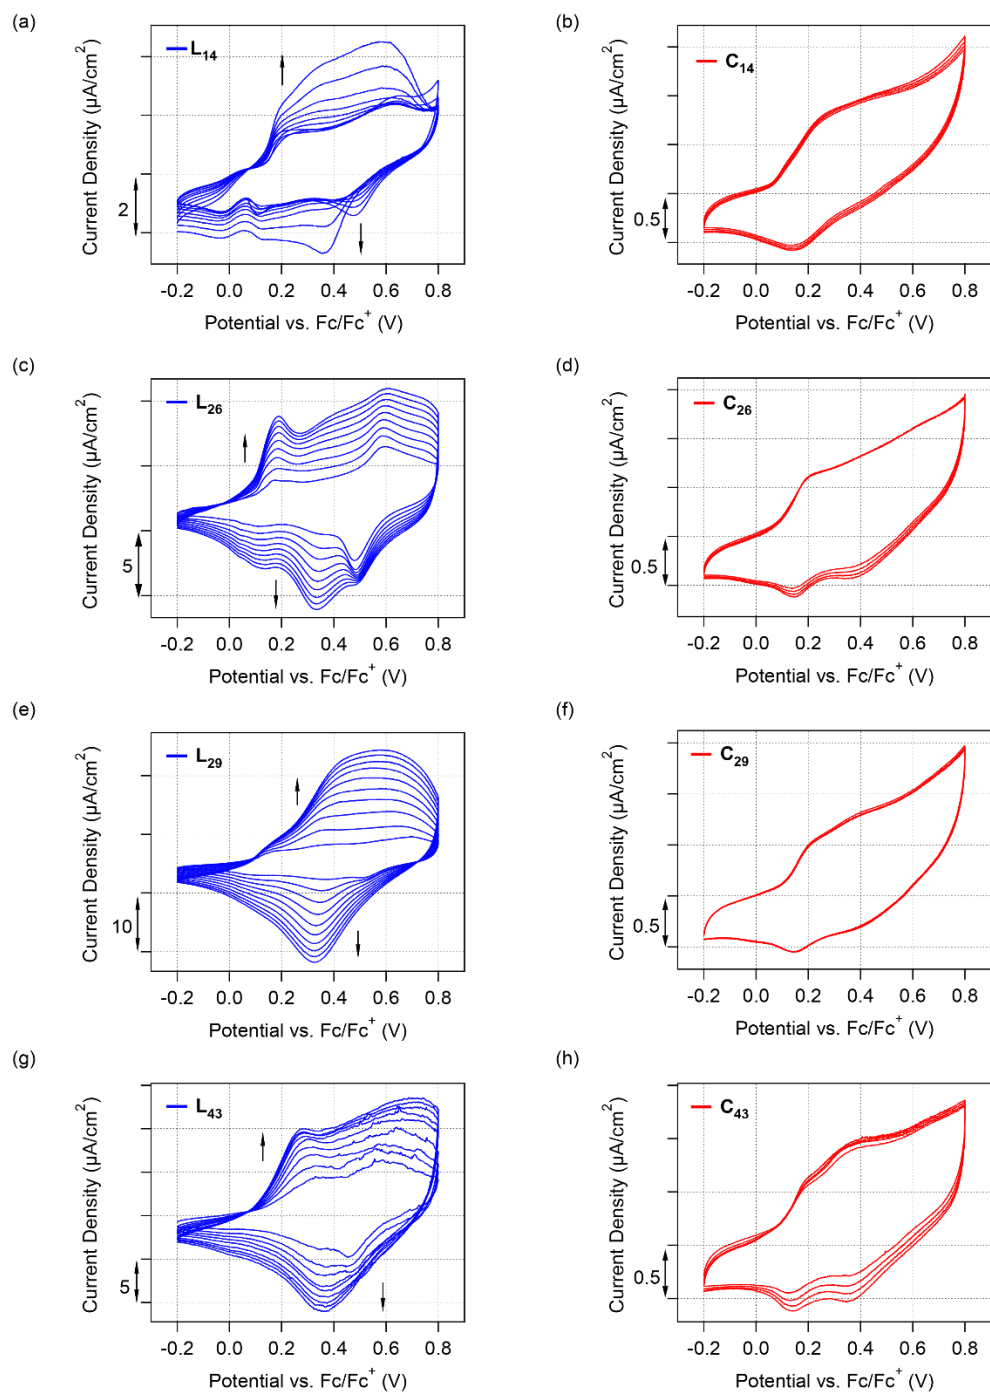

**Figure S15.** Cyclic voltammograms of (a)  $L_{14}$ , (b)  $C_{14}$ , (c)  $L_{26}$ , (d)  $C_{26}$ , (e)  $L_{29}$ , (f)  $C_{29}$ , (g)  $L_{43}$ , and (h)  $C_{43}$  (Linear P3HT, 2nd–10th cycles; Cyclic P3HT, 2nd–5th cycles). For  $C_{26}$  and  $C_{43}$ , the current density slightly increased due to the residual linear impurities.

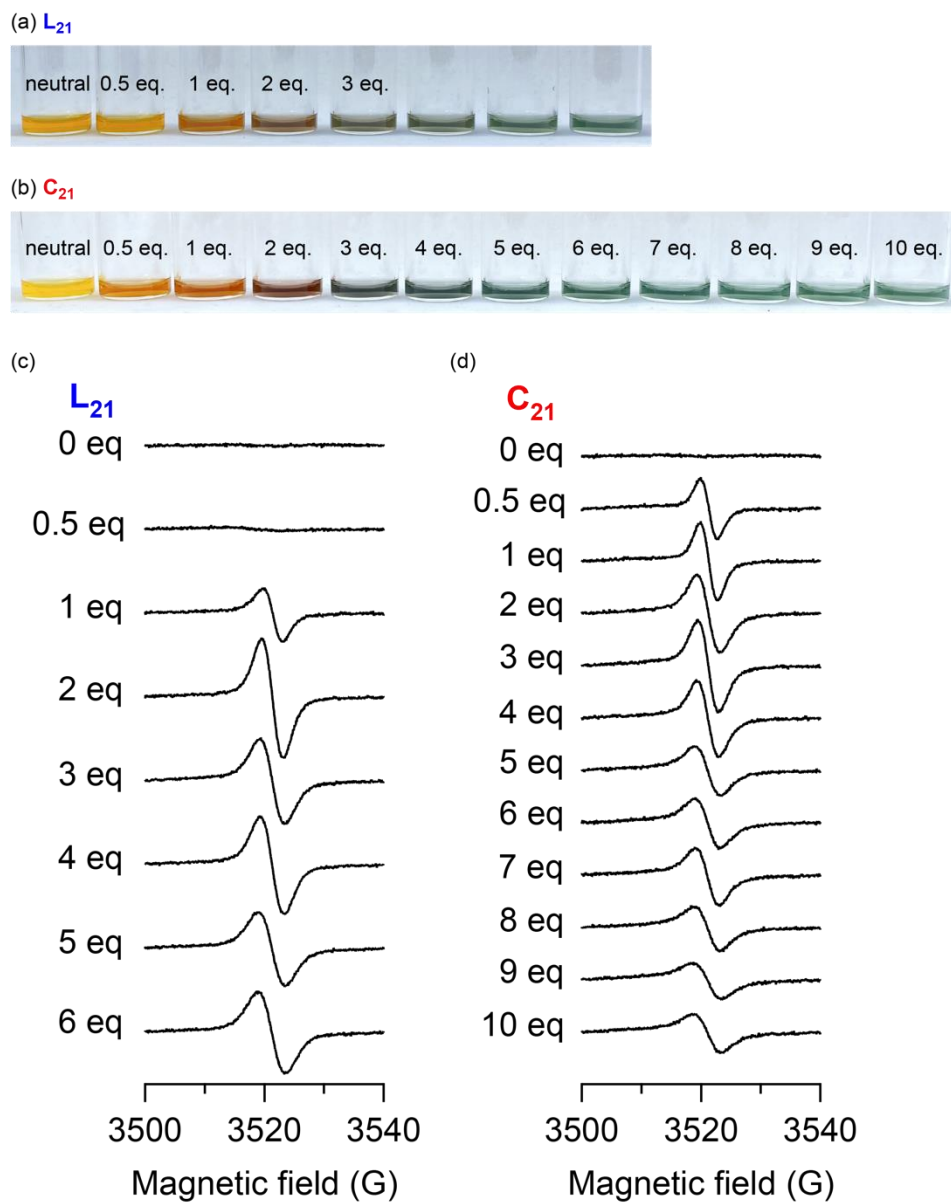

**Figure S16.** Photographs of (a)  $L_{21}$  and (b)  $C_{21}$  upon oxidation by  $AgSbF_6$ . ESR spectra of (c)  $L_{21}$  and (d)  $C_{21}$  upon oxidation. “eq” indicates the molar equivalent of added  $AgSbF_6$  with respect to the P3HT macromolecules.

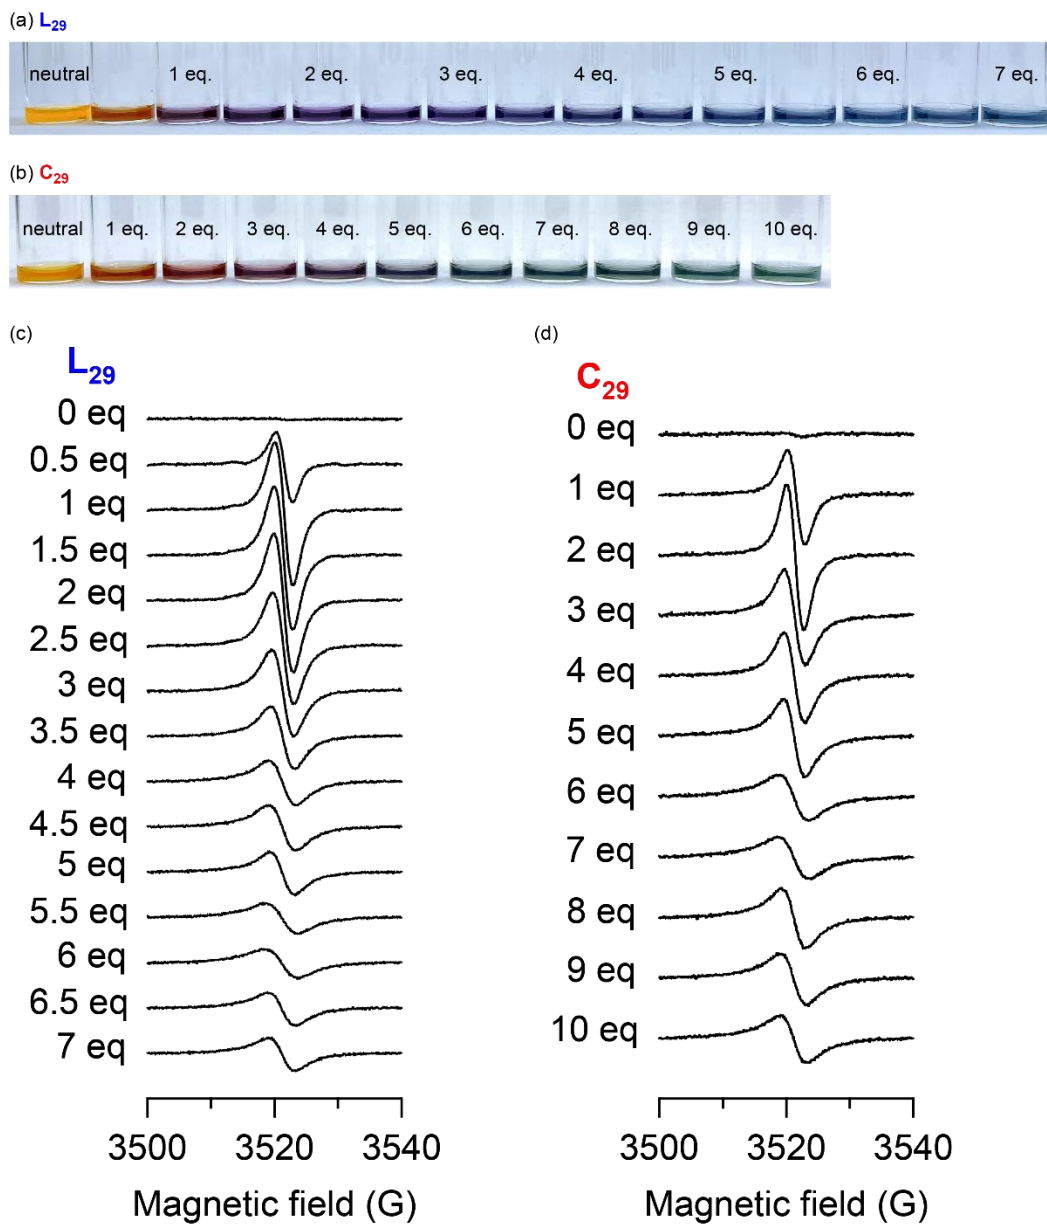

**Figure S17.** Photographs of (a) **L<sub>29</sub>** and (b) **C<sub>29</sub>** upon oxidation by  $\text{AgSbF}_6$ . ESR spectra of (c) **L<sub>29</sub>** and (d) **C<sub>29</sub>** upon oxidation. “eq” indicates the molar equivalent of added  $\text{AgSbF}_6$  with respect to the P3HT macromolecules.

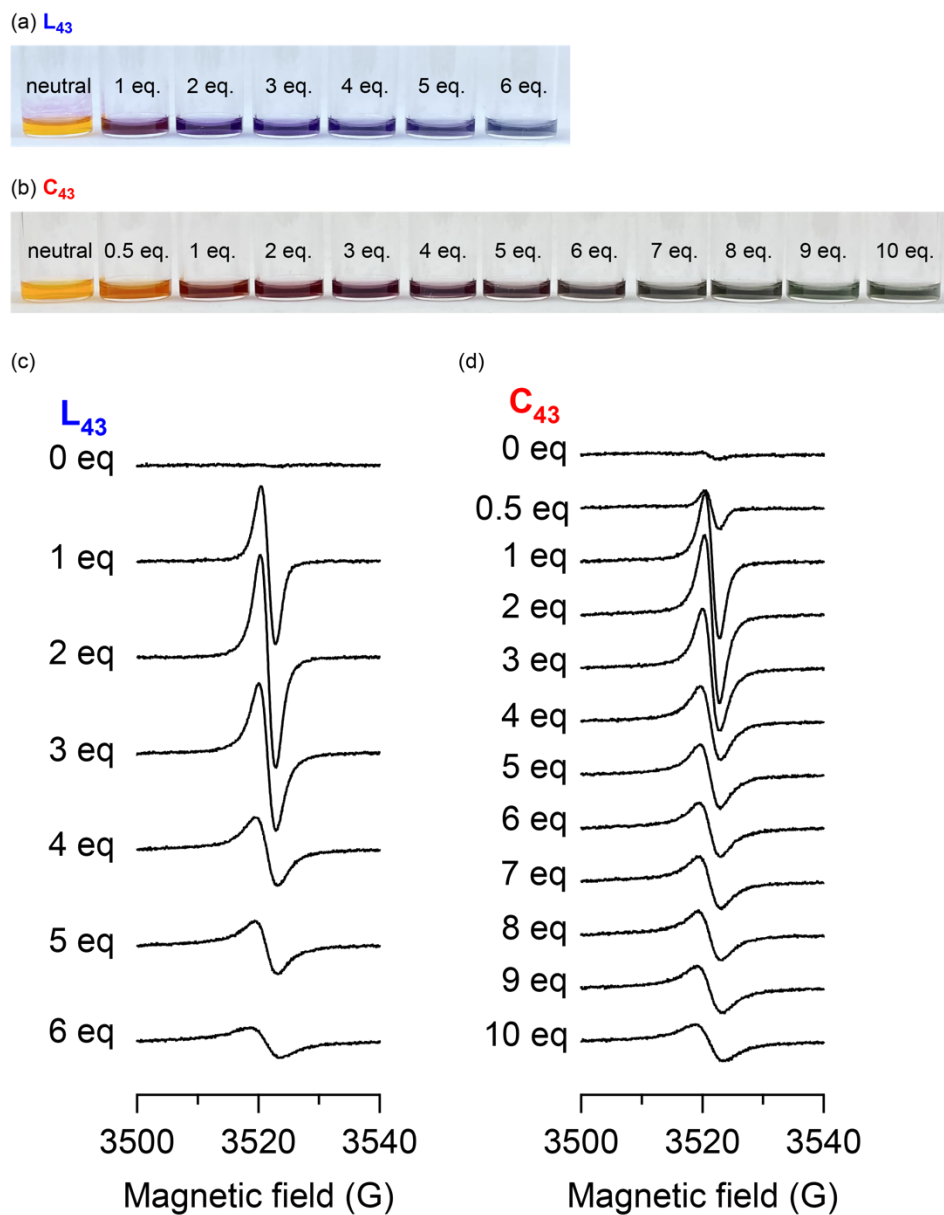

**Figure S18.** Photographs of (a)  $L_{43}$  and (b)  $C_{43}$  upon oxidation by  $AgSbF_6$ . ESR spectra of (c)  $L_{43}$  and (d)  $C_{43}$  upon oxidation. “eq” indicates the molar equivalent of added  $AgSbF_6$  with respect to the P3HT macromolecules.

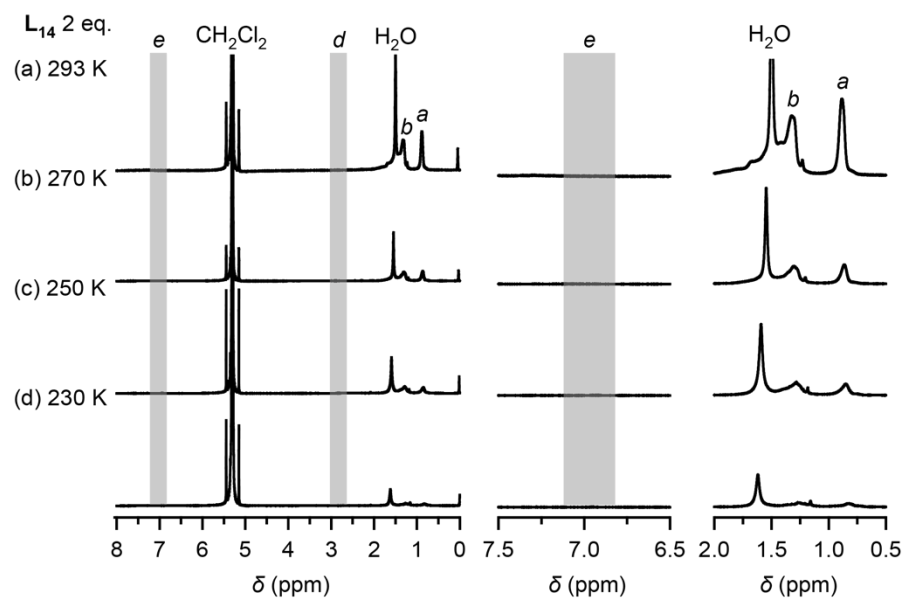

**Figure S19.** VT  $^1\text{H}$  NMR spectra of **L<sub>14</sub>** with 2 equiv of  $\text{AgSbF}_6$ .

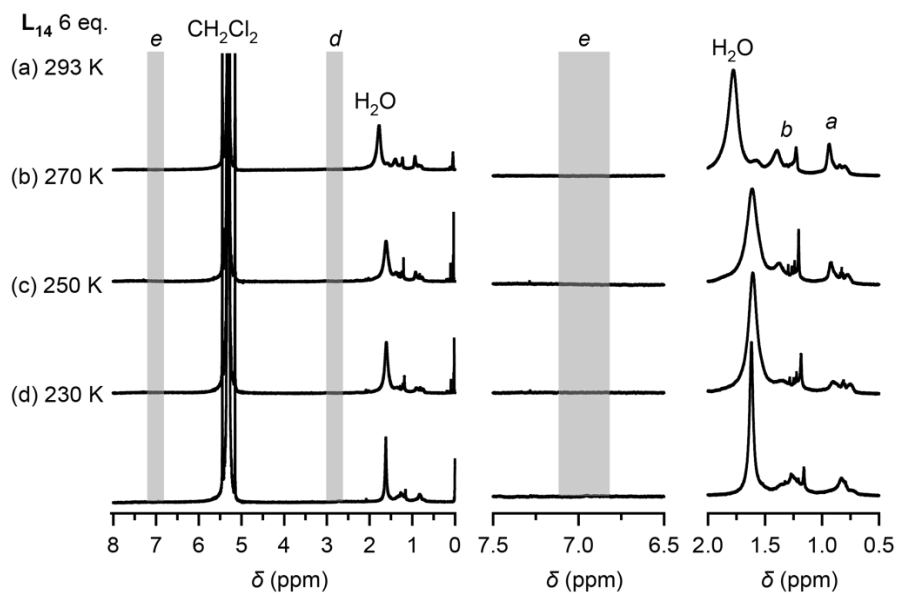

**Figure S20.** VT  $^1\text{H}$  NMR spectra of **L<sub>14</sub>** with 6 equiv of  $\text{AgSbF}_6$ .

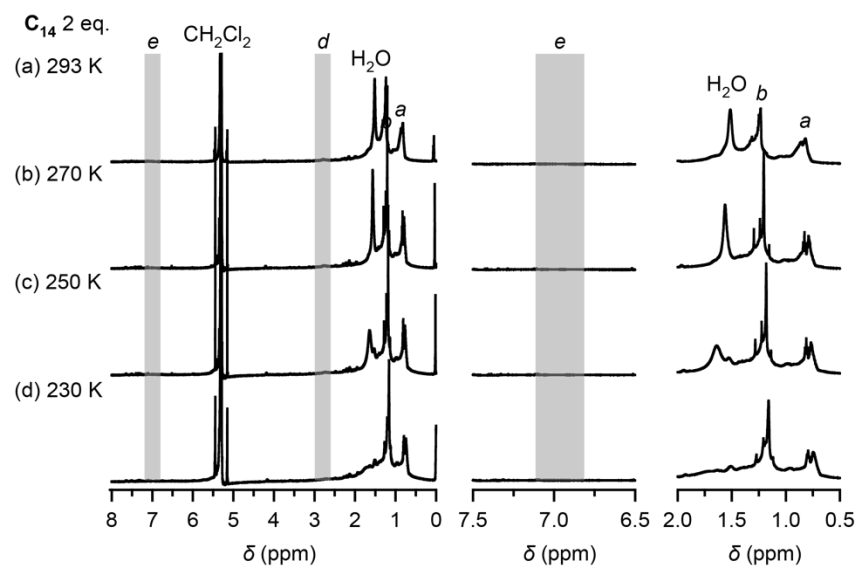

**Figure S21.** VT  $^1\text{H}$  NMR spectra of **C<sub>14</sub>** with 2 equiv of  $\text{AgSbF}_6$ .

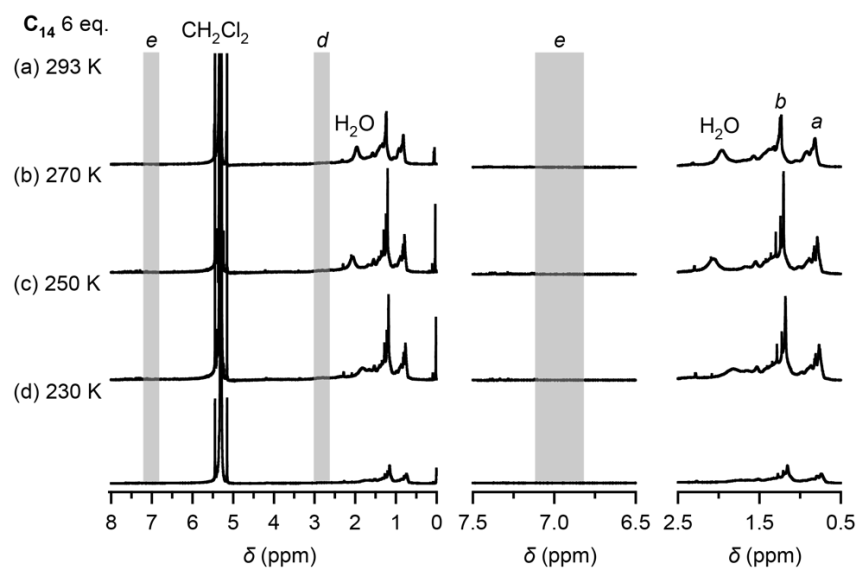

**Figure S22.** VT  $^1\text{H}$  NMR spectra of **C<sub>14</sub>** with 6 equiv of  $\text{AgSbF}_6$ .
